# Supplementary material
Source: ML conference proceedings conference paper supplement (https://openreview.net/forum?id=xVuEdAfnKT)
Supplement: supplementary_material [file attachment]

## A GROUNDATTACK AND SELECTOR $\psi_s$ TYPES

To facilitate better understanding and implementation, we present a detailed pipeline of GroundAttack and various strategies for the selector  $\psi_s$  in Figure 6. The pipeline below displays the illustrative frameworks introduced in Section 2.

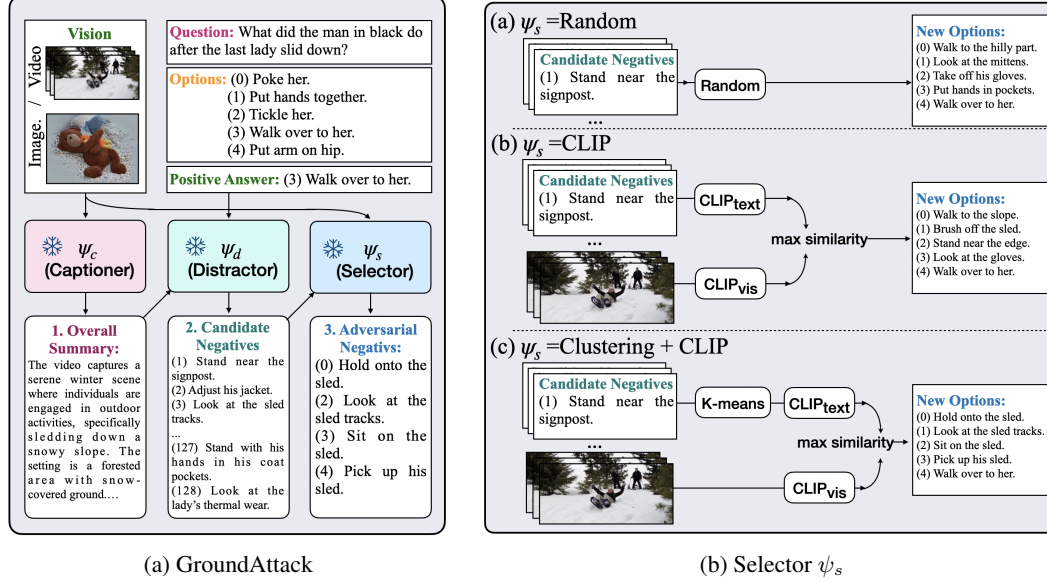

Figure 6: **GroundAttack** generates adversarial negative options that are more confusing, diverse, and visually groundable than original negatives. It mitigates Easy-Options Bias in VQA benchmarks through three components: (1) the Captioner ( $\psi_c$ ), which converts visual content into detailed descriptions; (2) the Distractor ( $\psi_d$ ), which produces plausible, groundable negative candidates; and (3) the Selector ( $\psi_s$ ), which identifies the most adversarial negatives.

## B PROMPTS FOR CAPTIONER $\psi_c$ AND DISTRACTOR $\psi_d$

We define the roles of the captioner  $\psi_c$  and distractor generator  $\psi_d$  as follows:

- We utilize GLM-4.1V-9B as the captioner  $\psi_c$  to convert video or image-based visual inputs  $V$  into descriptive textual captions  $T$ .
- For the distractor  $\psi_d$ , we employ Gemma-3n-E48 to generate candidate negative answers  $O_c$  conditioned on the question  $Q$ , the correct answer  $A$ , and the visual captions  $T$ .
- For image inputs, captions are generated based on salient objects, attributes, spatial relationships, and the overall scene.
- For video inputs, captions focus on objects, locations, atmosphere, and dynamic actions.

### B.1 PROMPTS FOR IMAGES

We present the three prompts used in GLM-4.1V-9B for **image captions** as follows:

**Prompt for generating fact from image**

You are an assistant that generates descriptive facts about an image.

### Instructions:

1. Input: You will be given an image.
2. Task: Based on the image, produce a concise descriptive caption in one or two sentences.
3. Output format: Return the result strictly as a Python JSON string, using the following structure:
 

```
{
  "fact": "string"
}
```
4. Constraints:
  - Only output the JSON string, no explanations or additional text.
  - All keys and string values must be enclosed in double quotes ("").
  - Ensure the JSON is valid Python syntax.

### Prompt for detect object bounding boxes from image

You are an assistant that generates detailed object information from an image.

### Instructions:

1. Input: You will be given an image.
2. Task: Detect at least 6 objects. For each object, specify:
  - color
  - size
  - texture
  - bounding box coordinates

The bounding box must be represented as normalized percentages of the image dimensions, in the format [x\_min, y\_min, x\_max, y\_max], where each value is between 0.0 and 1.0.

3. Output format: Return the result strictly as a Python JSON string, using the following structure:
 

```
{ "objects": ["string", "string", ...],
  "object_details": {
    "object1": { "color": "string", "size": "string", "texture": "string", "bounding_box": [x_min, y_min, x_max, y_max] },
    "object2": { "color": "string", "size": "string", "texture": "string", "bounding_box": [x_min, y_min, x_max, y_max] } } }
```
4. Constraints:
  - Bounding box values must be floats between 0.0 and 1.0, representing percentages of the image dimensions.
  - Only output the JSON string, no explanations or additional text.
  - All keys and string values must be enclosed in double quotes ("").
  - Ensure the JSON is valid Python syntax.

**Prompt for extract action, spatial relations from image**

You are an assistant that extracts actions, scene context, and spatial relations from an image.

### Instructions:

1. Input: You will be given an image.
2. Task: Based on the image, identify:
  - actions: Any motions or interactions happening.
  - human\_actions: Specific actions performed by humans.
  - spatial\_relations: Relative positions between key objects (e.g., "cup on table").
  - scene: A single sentence summarizing the overall setting (e.g., "A cozy café interior at dusk").
3. Output format: Return the result strictly as a Python JSON string, using the following structure:
 

```
{ "actions": ["string", "string", ...], "spatial_relations": ["string", "string", ...], "scene": "string" }
```
4. Constraints:
  - Only output the JSON string, no explanations or additional text.
  - All keys and string values must be enclosed in double quotes ("").
  - Ensure the JSON is valid Python syntax.

**Prompt for generating distractors for Image VQA**

We present the prompt used in Gemma-3n-E48 for generating 128 **candidate negative options** as follows.

You are an expert at generating challenging negative distractors for image-based question answering. Given an image description, a question, and its correct answer, generate 128 clearly and definitively incorrect answer options.

### Guidelines:

1. **\*\*Grounded in the image\*\***: Each distractor must reference actual events, objects, or details mentioned in the image description.
2. **\*\*Specifically Incorrect\*\***: None of the distractors should correctly answer the given question.
3. **\*\*Deceptively Similar\*\***: Distractors should resemble the correct answer in format, length, or type, making them plausible at first glance.
4. **\*\*No Hallucinations\*\***: Do not introduce objects, actions, or details not present in the image description.

### Example:

[Image Description]: A white dog is lying on a pet bed.

[Question]: What does the white dog do after going to the cushion?

[Correct Answer]: Smells the black dog

[Negative Options] (JSON format):

```
{
  "new_negatives": {
    "0": "Lies down on the pet bed.",
    "1": "Walks toward the black dog.",
    "2": "Explores the pet bed.",
    "3": "Watches the black dog."
  }
}
```

### Output:

- Provide exactly 128 numbered negative options.
- The output must be valid JSON following the structure above.
- Ensure the output is UTF-8 encoded.

**B.2 PROMPTS FOR VIDEOS**

We present the three prompts used in GLM-4.1V-9B for **video captions** as follows:

**Prompt for generating fact from video**

You are an assistant that generates descriptive facts about a video.

### Instructions:

1. **Input**: You will be given a few video frames.
2. **Task**: Based on these frames, produce a concise descriptive caption in few sentences.
3. **Output Format**: Return the result strictly as a Python JSON string, using the following structure:

```
{
  "fact": "string"
}
```

4. **Constraints**:
  - Only output the JSON string; no explanations or additional text.
  - All keys and string values must be enclosed in double quotes ("").
  - Ensure the JSON is valid Python syntax.

**Prompt for detect objects from video**

You are an assistant that generates detailed object information from a video.

### Instructions:

1. **Input**: You will be given a few video frames.
2. **Task**: Detect at least 6 objects. For each object, specify:
  - color
  - size
  - texture
  - spatial relations between objects
3. **Output Format**: Return the result strictly as a Python JSON string, using the following structure:

```
{ "objects": ["string", "string", ...],
  "object_details":
    "object1": "color": "string", "size": "string", "texture": "string" ,
    "object2": "color": "string", "size": "string", "texture": "string" ,
    "spatial_relations": [
      "object1 on top of object2",
      "object3 next to object4", ... ]
}
```

4. **Constraints**:
  - Only output the JSON string; no explanations or additional text.
  - All keys and string values must be enclosed in double quotes ("").
  - Ensure the JSON is valid Python syntax.

**Prompt for extracting actions from video**

You are an assistant that extracts actions, scene context, and spatial relations from a video.

### Instructions:

1. **Input**: You will be given a few video frames.
2. **Task**: Based on these frames, identify:
  - **actions**: Any motions or interactions happening.
  - **human\_actions**: Specific actions performed by humans.
  - **spatial\_relations**: Relative positions between key objects (e.g., "cup on table").
  - **scene**: A single sentence summarizing the overall setting (e.g., "A cozy café interior at dusk").
3. **Output Format**: Return the result strictly as a Python JSON string, using the following structure:
 

```
{
  "actions": ["string", "string", ...],
  "spatial_relations": ["string", "string", ...],
  "scene": "string"
}
```
4. **Constraints**:
  - Only output the JSON string; no explanations or additional text.
  - All keys and string values must be enclosed in double quotes ("").
  - Ensure the JSON is valid Python syntax.

**Prompt for generating distractors for Video VQA** We present the prompt used in Gemma-3n-E48 for generating 128 **candidate negative options** as follows.

You are an expert at generating challenging negative distractors for video-based question answering. Given a video description, a question, and its correct answer, generate 128 clearly and definitively incorrect answer options.

### Guidelines:

1. **Grounded in the Video**: Each distractor must reference actual events, objects, or details mentioned in the video description.
2. **Specifically Incorrect**: None of the distractors should correctly answer the given question.
3. **Deceptively Similar**: Distractors should resemble the correct answer in format, length, or type, making them plausible at first glance.
4. **No Hallucinations**: Do not introduce objects, actions, or details not present in the video description.

### Example:

[Video Description]: A white dog is lying on a pet bed.

[Question]: What does the white dog do after going to the cushion?

[Correct Answer]: Smells the black dog

[Negative Options] (JSON format):

```
{
  "new_negatives": {
    "0": "Lies down on the pet bed.",
    "1": "Walks toward the black dog.",
    "2": "Explores the pet bed.",
    "3": "Watches the black dog."
  }
}
```

### Output:

- Provide exactly 128 numbered negative options.
- The output must be valid JSON following the structure above.
- Ensure the output is UTF-8 encoded.
